# Supplementary material
Source: publisher figshare collection journal article supplement (https://frontiersin.figshare.com/ndownloader/files/16706402)

**Figure 1:** Heatmap of top 25% lipid species in the skeletal muscle of the rats: C, chow diet; E, Endurance training with chow diet; H, high-fat diet; HE, endurance training with high-fat diet

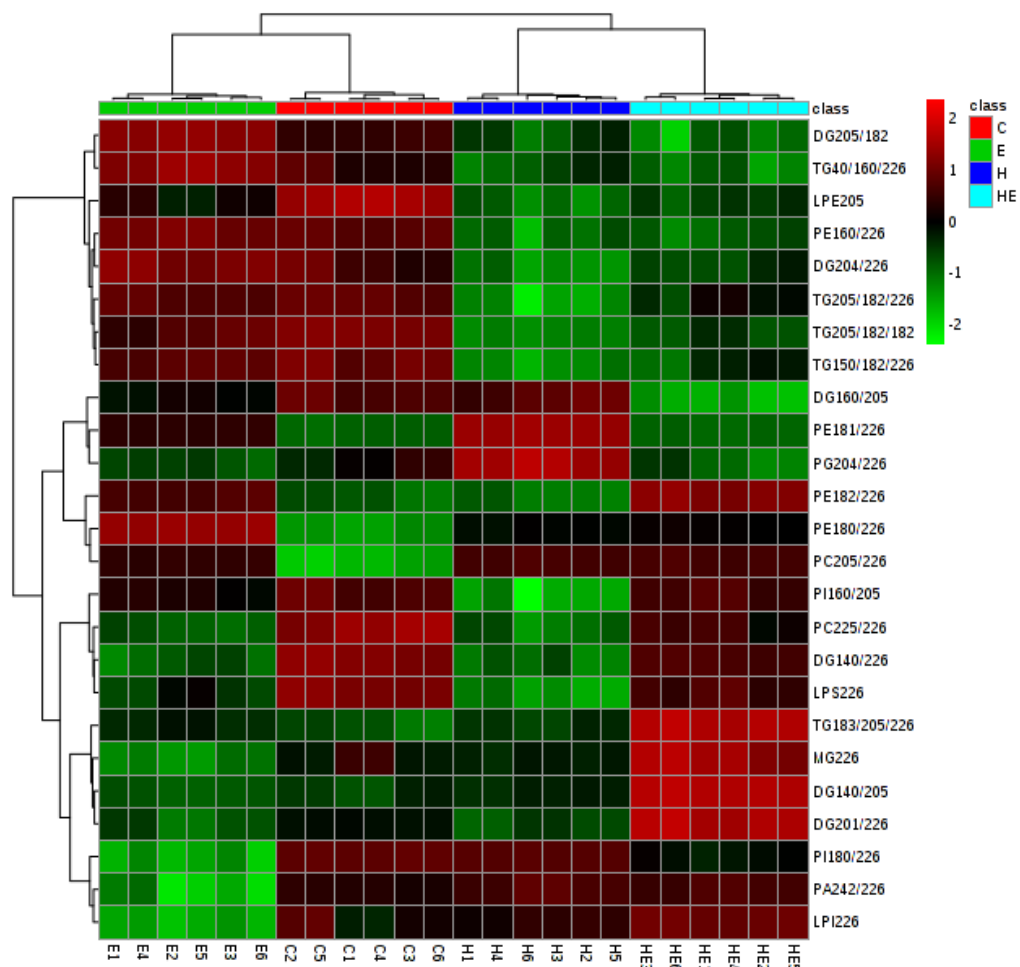

Supplement: Supplementary file [file 16706402]
